# Supplementary material for: Development of a novel carbon-coating strategy for producing core–shell structured carbon coated LiFePO4for an improved Li-ion battery performance
Source: Royal Society of Chemistry journal article supplement (doi:10.1039/c6cp06923a), 2016-11-17
Supplement: c6cp06923a1.pdf [file c6cp06923a1.pdf]

Supporting Information (SI)

**Development of a Novel Carbon-Coating Strategy for Producing Core-Shell  
Structured Carbon Coated LiFePO<sub>4</sub> for Improved Li-ion Battery Performance**

Parakandy Muzhikara Pratheeksha,<sup>a,d</sup> Erabhoina Hari Mohan,<sup>a</sup> Bulusu Venkata Sarada,<sup>b</sup>

Mantripragada Ramakrishna,<sup>c</sup> Kalyan Hembram,<sup>a</sup> Pulakhandam Veera Venkata Srinivas,<sup>a</sup> Paul

Joseph Daniel,<sup>d</sup> Tata Narasinga Rao,<sup>a</sup> Srinivasan Anandan,<sup>a\*</sup>

<sup>a</sup> Centre for Nano Materials, <sup>b</sup> Centre for Solar Energy Materials, <sup>c</sup> Centre for Materials

Characterization and Testing, International Advanced Research Centre for Powder Metallurgy

and New Materials, Hyderabad-500 005, India

<sup>d</sup> Department of Physics, National Institute of Technology, Warangal-506 004, India

\*Email: [anandan@arci.res.in](mailto:anandan@arci.res.in)

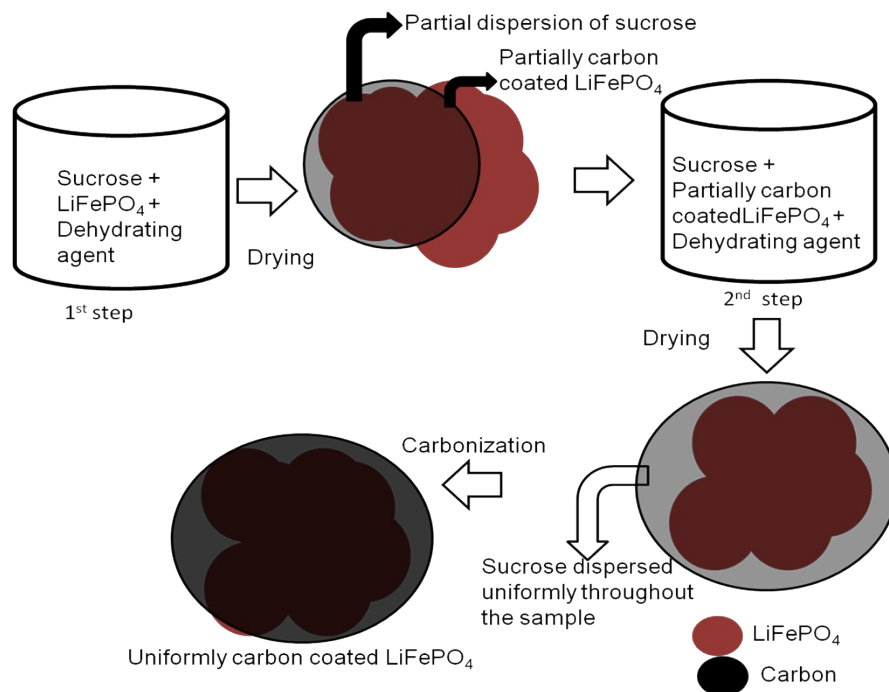

**Fig. S1.** Schematic showing the continuous carbon coating by DAP process

The schematic diagram showing the continuous carbon coating process by DAP process is included in the supporting information as Fig. S1. The dehydrating agent, which when added to the sucrose solution during carbon coating, plays a crucial role in achieving a uniform carbon coverage on LFP. It helps in catenation of carbon atoms through dehydration of water molecule from sucrose molecules, which is followed by thermo-polymerization of dehydrated sucrose molecules and thereby contributing uniform graphitic carbon coating surrounding LFP particles after carbonization.

41 The FE-SEM images of as-synthesized heat-treated and carbon coated LFP have included in **Fig.**  
42 **S2, Fig. S3** and **Fig. S4**. It is observed that the morphology of heat-treated LFP and carbon coated  
43 LFP (**Fig. S3 and Fig S4**) are similar, implying that carbon coating doesn't change the morphology  
44 of LFP particles before and after carbon coating as carbon coating is purely a surface modification.  
45 However, the morphology of as-synthesized LFP is different from these LFP particles and the  
46 reasons are not clear at this juncture. Similar kind of difference in morphology between as-  
47 synthesized and heat-treated particles by flame spray pyrolysis has reported by Wagner research  
48 group (c.f. Wagner et al, Transl. Mater. Res, 2016, 3, 025001), who extensively studied the  
49 synthesis of various nanoparticles by flame spray pyrolysis unit. They reported that as-synthesized  
50 particles showed mixed morphology when obtain from FSP before annealing and later showed  
51 uniform morphology after annealing, indicating that some un-reacted molecules during FSP  
52 process responsible for mixed morphology. However, later the un-reacted molecules fused  
53 together during heat treatment and form uniform morphology. Similarly, in the present study,  
54 though as-synthesized LFP shows mixed morphology, the same LFP particles shown uniform  
55 morphology after heat treatment, demonstrating that LFP particles produced by FSP upon  
56 annealing shows homogeneous morphology.

57

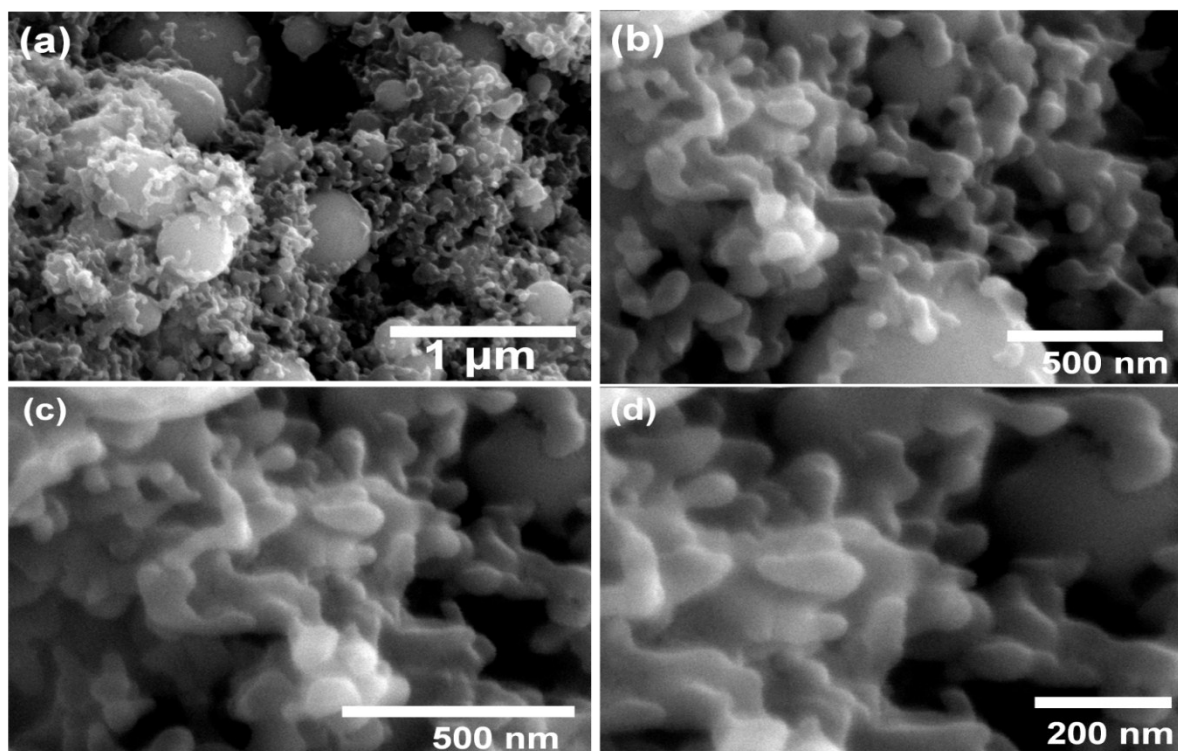

**Fig. S2:** FE-SEM images of as-synthesized  $\text{LiFePO}_4$

75  
76  
77  
78  
79  
80  
81  
82  
83  
84  
85  
86  
87  
88  
89  
90  
91  
92  
93  
94  
95  
96  
97  
98  
99  
100  
101  
102  
103  
104  
105

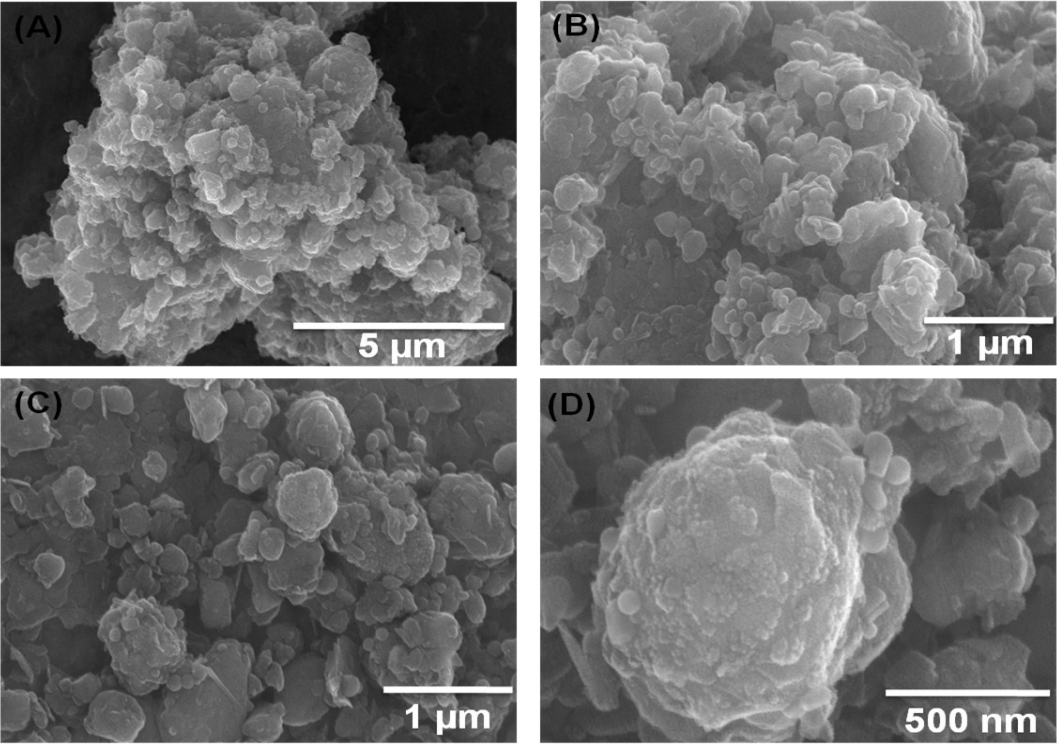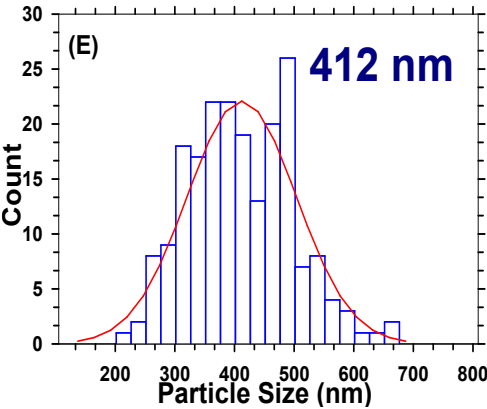

**Fig. S3:** FE-SEM images of heat treated  $\text{LiFePO}_4$  (A-D) and Histogram showing particle size Distribution(E)

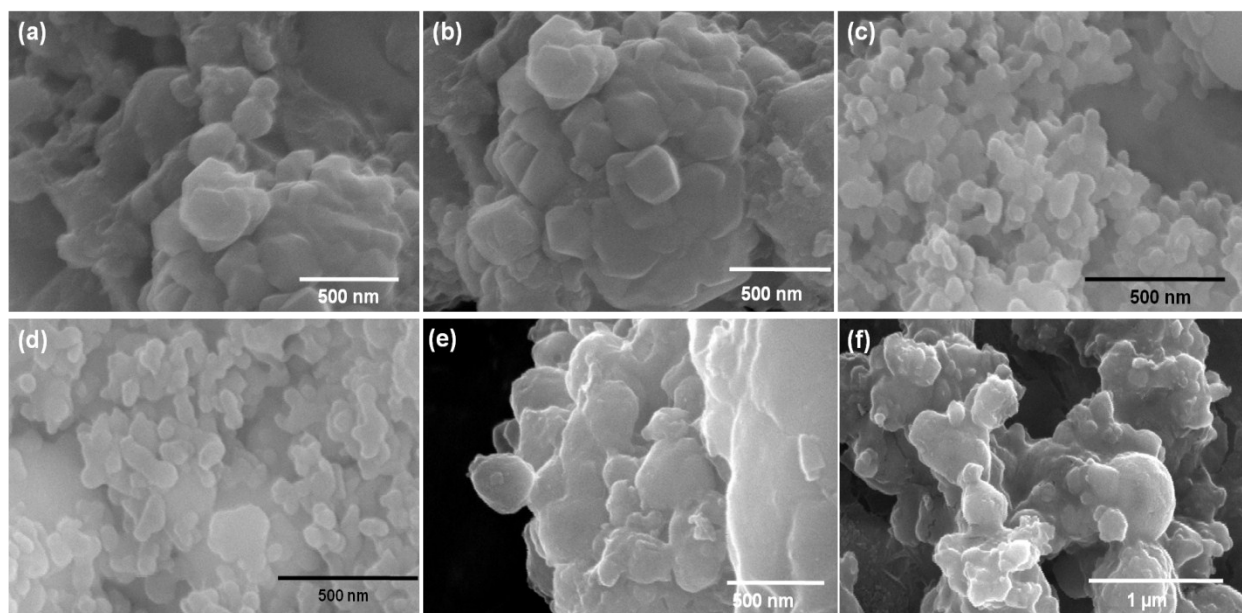

**Fig. S4.** FE-SEM images of  $\text{LiFePO}_4$  carbon coated C-LFP-1(a-b), C-LFP-3(c-d) and C-LFP-4 (e-f) using DAP process

127

128

129

130

131

132

133

134

135

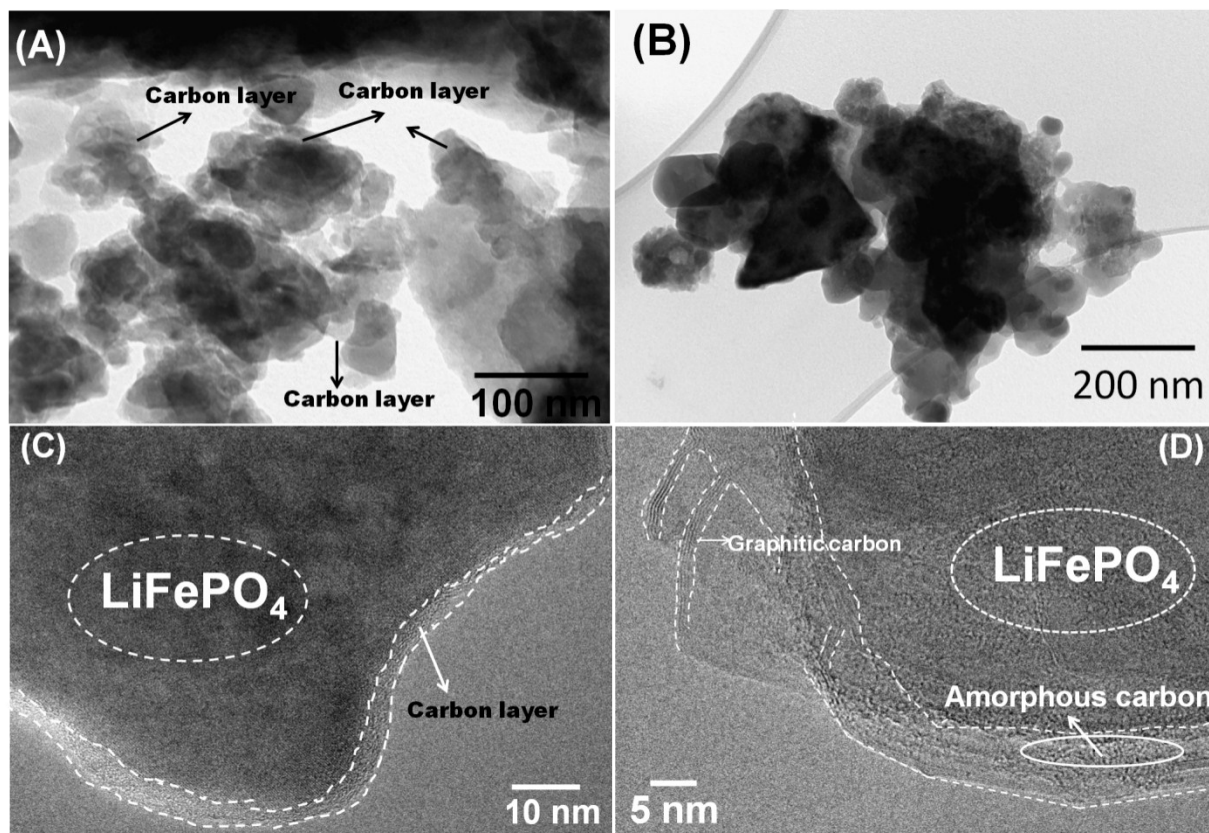

137

138

139

140 **Fig. S5:** HR-TEM images of C-LFP-2 showing the core shell structure with the presence of  
141 graphitic and crystalline carbon on LFP.

142

143

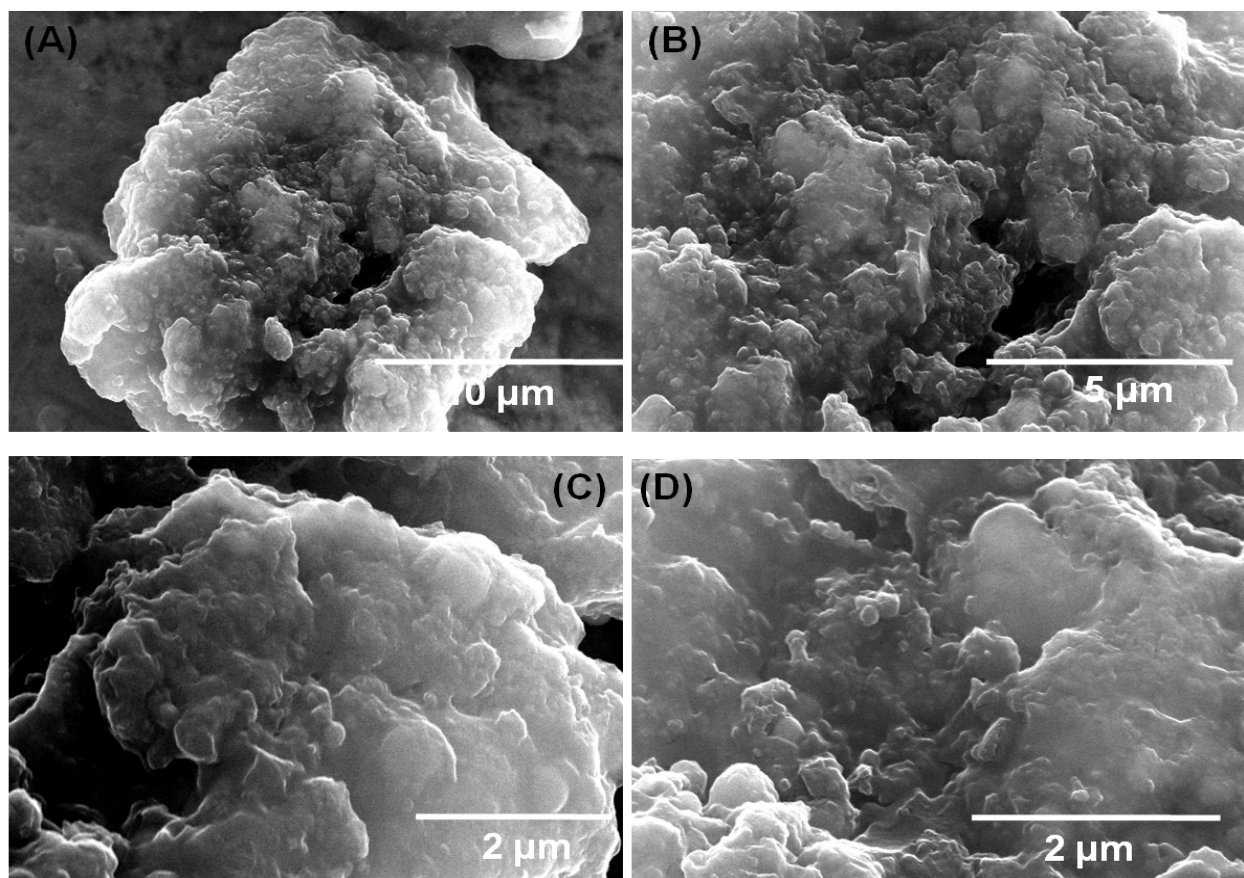

**Fig. S6.** FE-SEM images of C-LFP-2 taken at low magnification (A-D)

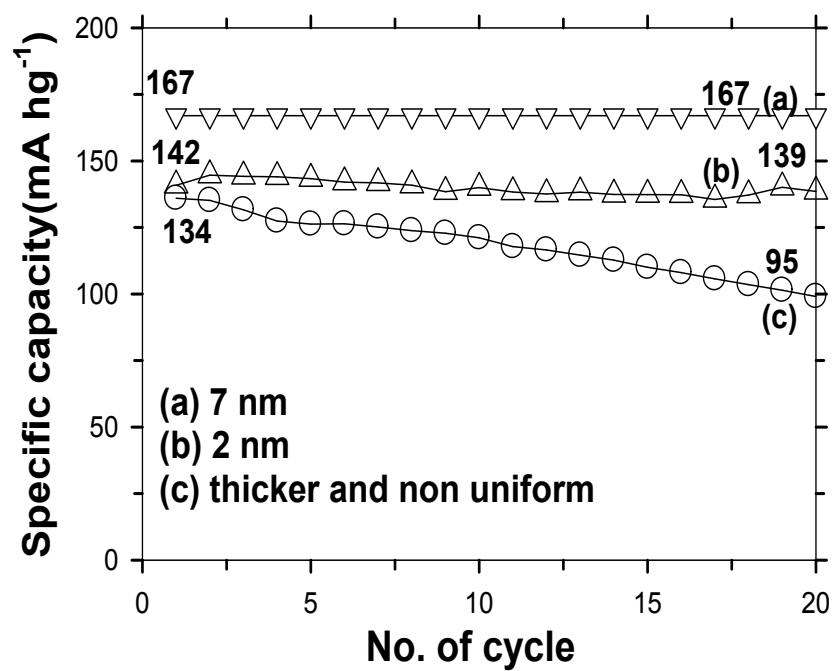

**Fig. S7:** Cyclic stability of DAP carbon coated LFP studied with varying thickness at 1C rate

175

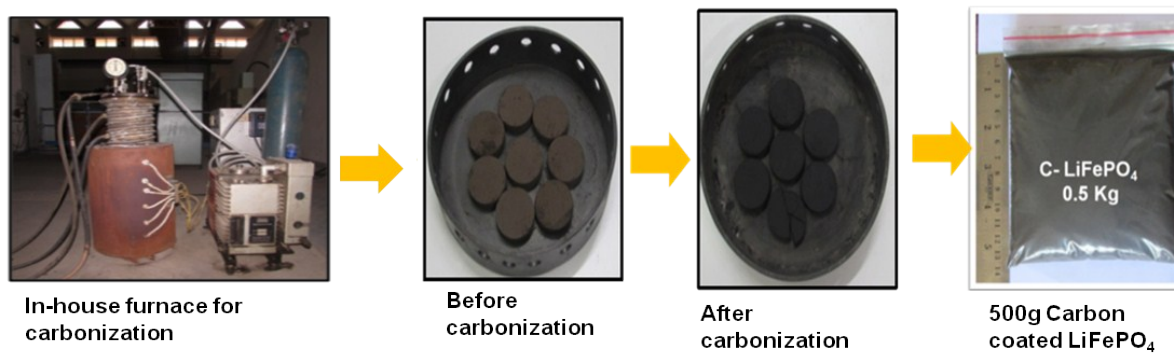

176

177 **Fig. S8:** Carbonization strategy for bulk carbon coating.

178

179

180

181

182

183

184

185

186

187

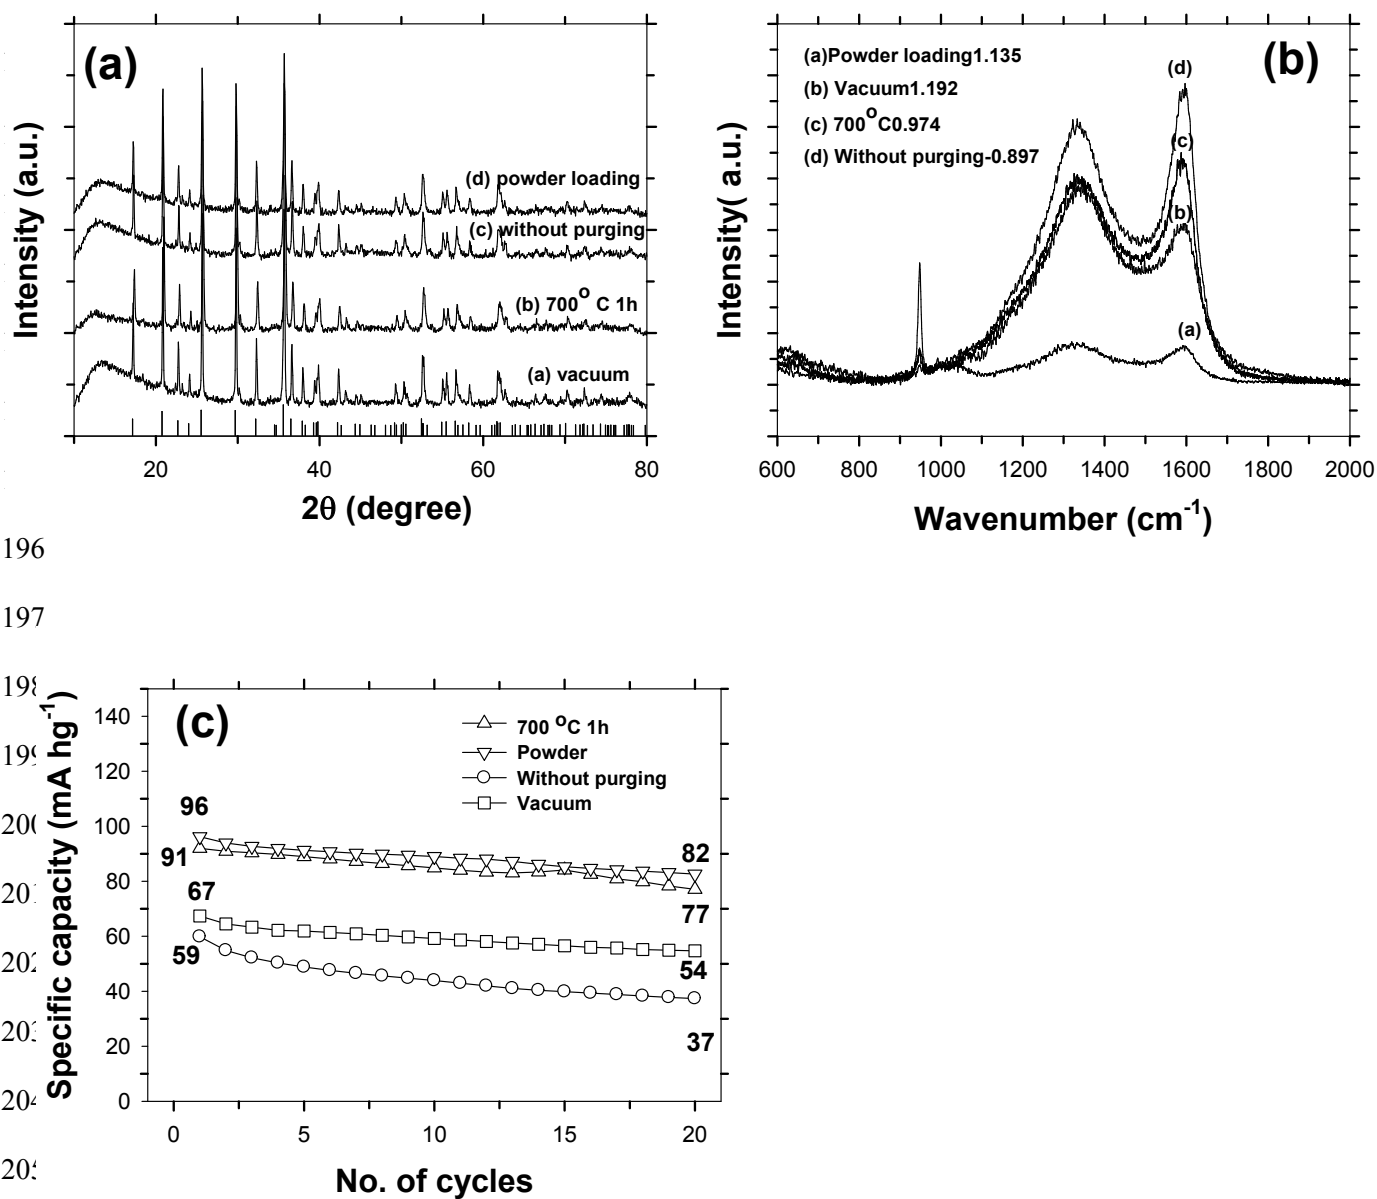

**Fig. S9:** Comparison of (a) X-ray diffraction analysis, (b) Raman analysis and (c) cyclic stability for optimization conditions of bulk carbon coated LiFePO<sub>4</sub>

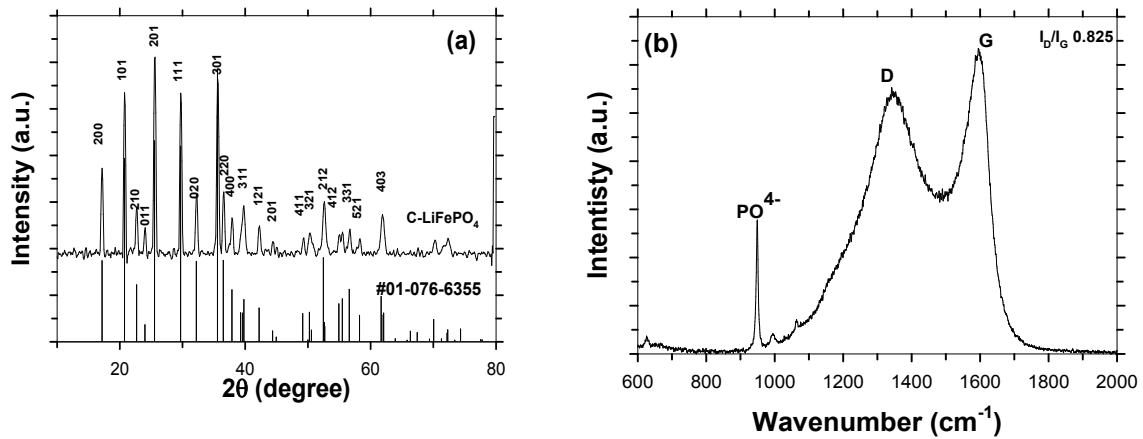

**Fig. S10:** (a) X-ray diffraction pattern and (b) Raman spectra of C-LFP-2B

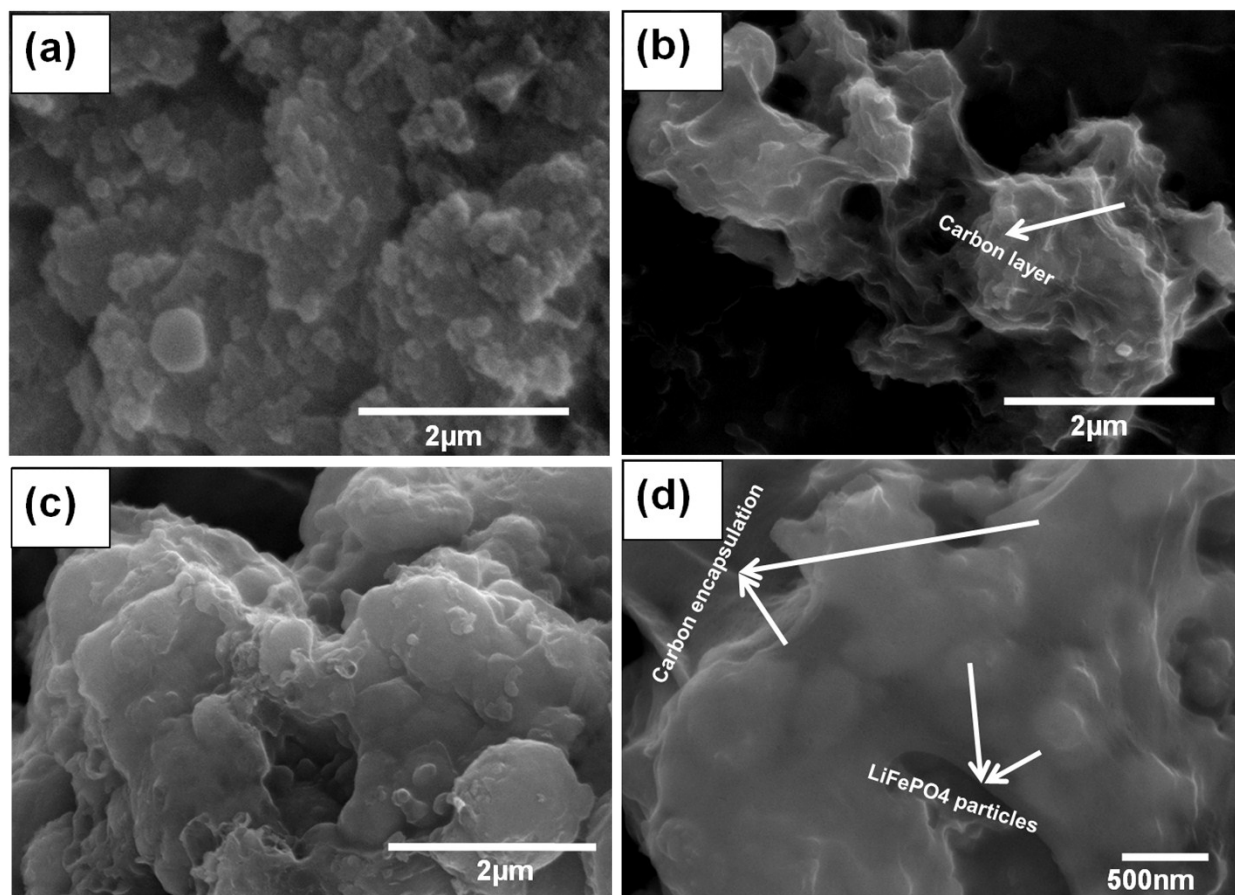

**Fig. S11:** FE-SEM images of C-LFP-2B

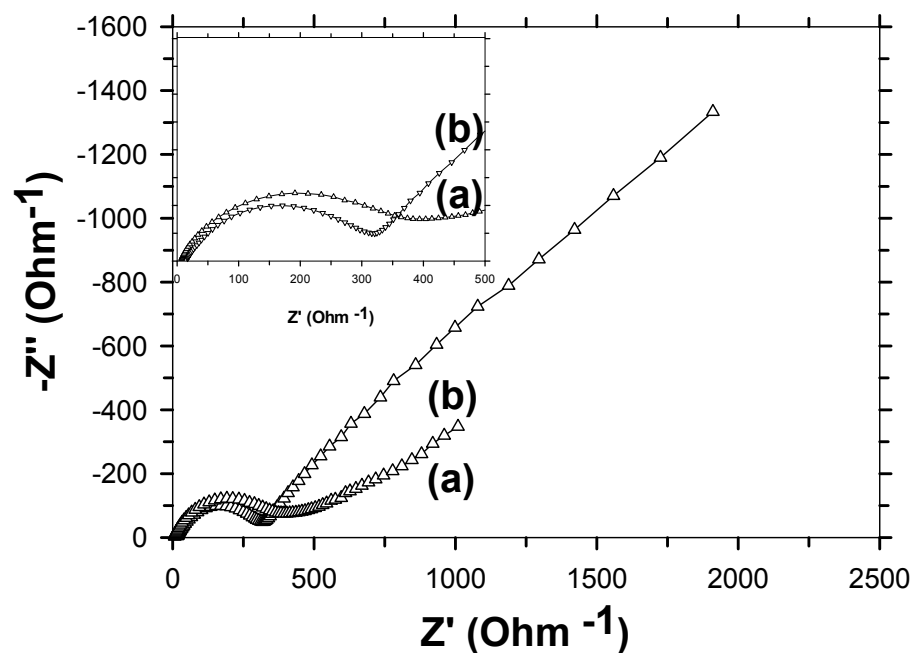

**Fig. S12:** EIS spectra of pristine LFP (a) and C-LFP-2B (b) carried out in a frequency of 0.01mHz to 100 kHz

## 259 **Calculation of specific energy:**

260 The specific energy of the full cell was calculated by the following equation as reported  
261 previously.<sup>1,2</sup>

$$262 \quad E = (V * m * C) / W$$

263 Where

264  $V$  = Nominal cell voltage (V)

265  $m$  = Active material weight (g)

266  $C$  = Cathode limited specific capacity (mA h g<sup>-1</sup>)

267  $W$  = Weight of the cell components (Active material weight of cathode + active material weight  
268 of anode + weight of separator + weight of electrolyte)

269 The specific energy of cathode (C-LFP) developed in the present study in full cell is calculated as  
270 follows:

$$271 \quad E = (1.87 \text{ V} * 0.0067 \text{ g} * 115 \text{ mA h g}^{-1}) / (0.0787 \text{ g})$$

$$272 \quad E = 18 \text{ W h kg}^{-1}$$

273 For full cell using commercial electrodes specific energy is calculated as

$$274 \quad E = (1.87 \text{ V} * 0.0062 \text{ g} * 127 \text{ mA h g}^{-1}) / (0.07797 \text{ g})$$

$$275 \quad E = 18.8 \text{ W h kg}^{-1}$$

## 276 **References**

277. H. G. Jung, M. W. Jang, J. Hassoun, Y. K. Sun and B. Scrosati, *Nat. Commun.*, 2011, **2**, 1-5.

278. B. D. McCloskey, *J. Phys. Chem. Lett.*, 2015, **6**, 4581-4588.
